# Supplementary material for: Hyponatremia upon presentation to the emergency department – the need for urgent neuroimaging studies
Source: PubMed Central journal article supplement (PMC5434027; doi:10.1038/s41598-017-02030-6), 2017-05-16
Supplement: 41598_2017_2030_MOESM1_ESM.pdf [file 41598_2017_2030_MOESM1_ESM.pdf]

# **Hyponatremia upon presentation to the emergency department – the need for urgent neuroimaging studies**

**Arne Bokemeyer<sup>1#</sup> · Rainer Dziewas<sup>2</sup> · Heinz Wiendl<sup>2</sup> · Wolfram Schwindt<sup>4</sup> · Paul Bicsán<sup>3</sup> · Philipp Kümpers<sup>1\*</sup> · Hermann Pavenstädt<sup>1\*</sup>**

\*Authors contributed equally and are both considered senior authors

<sup>1</sup> Department of Medicine D, Division of General Internal Medicine, Nephrology, and Rheumatology, University Hospital Münster, Albert-Schweitzer-Campus 1 A1, 48149 Münster, Germany; <sup>2</sup> Department of Neurology, University Hospital Münster, Albert-Schweitzer-Campus 1 A1, 48149 Münster, Germany; <sup>3</sup> Division of Information Technology - Clinical Systems, University Hospital Münster, Albert-Schweitzer-Campus 1 D5, 48149 Münster, Germany; <sup>4</sup> Department of Radiology, University Hospital Münster, Albert-Schweitzer-Campus 1 A1, 48149 Münster, Germany. <sup>#</sup>Correspondence and requests for materials should be addressed to A.B. (email: arne.bokemeyer@ukmuenster.de)

**Supplementary Table S1. Predictors for pathological neuroimaging findings by logistic regression analysis**

|                                | <i>Univariate</i>  |                |
|--------------------------------|--------------------|----------------|
|                                | <b>OR (95% CI)</b> | <b>P-value</b> |
| Plasma sodium level            | 1.14 (0.97 – 1.35) | 0.105          |
| Gender (female)                | 0.83 (0.26 – 2.64) | 0.749          |
| Age                            | 0.92 (0.66 - 1.28) | 0.922          |
| Neurological symptoms          |                    |                |
| Weakness/Confusion             | 0.80 (0.28 – 2.30) | 0.681          |
| Nausea/Vomiting                | 1.31 (0.32 – 5.30) | 0.709          |
| Headache                       | 0.00               | 0.999          |
| Vertigo                        | 0.52 (0.11 – 2.49) | 0.411          |
| Seizures                       | 0.00               | 0.999          |
| Reduced state of consciousness | 0.98 (0.25 – 3.87) | 0.977          |
| Focal neurological signs*      |                    |                |

Odds ratios (OR), 95% confidence intervals (CI), and p-values were calculated by logistic regression analysis (backward elimination). Variables were selected *a priori* based on theoretical considerations and existing literature. Those statistically significant at the 10% level in the univariate analysis were included in the multivariate model; two-sided *p* values <0.05 were considered statistically significant in the multivariate model.

\* All patients with neuroimaging pathology had *focal neurological signs (FNS)*; it was therefore statistically impossible to calculate these OR and p-values for *FNS* by logistic regression analysis.

**Supplementary Table S2: All cases of patients with neuroimaging pathology related to acute symptomatology.**

| No. of pat. | Sex | Age | Serum-Na in mmol/l | Symptomatology                                                                          | Imaging findings                                   | Diagnosis                                       | Etiology of hyponatremia (for all association with cerebral process possible [e.g. SIAD]) |
|-------------|-----|-----|--------------------|-----------------------------------------------------------------------------------------|----------------------------------------------------|-------------------------------------------------|-------------------------------------------------------------------------------------------|
| 1           | M   | 55  | 124                | <u>FNS</u> – unilateral arm paralysis                                                   | Ischemic media infarction                          | Ischemic media stroke                           | Diuretics                                                                                 |
| 2           | F   | 32  | 123                | <u>FNS</u> – brachiofaziale hemiparalysis                                               | Encephalitis, multiple embolic infarctions         | Endocarditis with septic encephalitis           | Hypovolemia                                                                               |
| 3           | F   | 78  | 120                | <u>FNS</u> – unilateral gaze paralysis, pos. pyramidal sign; reduced state of vigilance | Encephalitis                                       | Herpesencephalitis                              | Diuretics                                                                                 |
| 4           | F   | 41  | 123                | <u>FNS</u> – leg paralysis                                                              | Tumor                                              | Malig. melanoma with cerebral metastases        | /                                                                                         |
| 5           | F   | 78  | 120                | <u>FNS</u> – aphasia; nausea/vomiting; vertigo/falls                                    | Ischemic media infarction                          | Ischemic media stroke                           | Hypervolemia                                                                              |
| 6           | F   | 85  | 115                | <u>FNS</u> – gait ataxia; weakness/confusion; nausea/vomiting; vertigo/falls            | Intracranial hemorrhage                            | Intracranial hemorrhage caused by head injury   | Diuretics                                                                                 |
| 7           | F   | 82  | 121                | <u>FNS</u> – hemiparalysis, aphasia                                                     | Ischemic media infarction                          | Ischemic media stroke                           | /                                                                                         |
| 8           | M   | 61  | 123                | <u>FNS</u> – unilateral gaze evoked nystagmus; nausea/vomiting                          | Tumor                                              | Bronchial-CA with cerebral metastases           | /                                                                                         |
| 9           | M   | 86  | 121                | <u>FNS</u> – hemiparalysis, dysarthria                                                  | Tumor                                              | Mamma-CA with cerebral metastases               | /                                                                                         |
| 10          | F   | 90  | 124                | <u>FNS</u> – aphasia                                                                    | Tumor                                              | Primary cerebral tumor                          | Neuroleptic drug                                                                          |
| 11          | M   | 79  | 120                | <u>FNS</u> – hemiparalysis; weakness/confusion                                          | Intracranial hemorrhage and epidural bleeding      | Intracranial hemorrhage and epidural bleeding   | Neuroleptic drug                                                                          |
| 12          | M   | 58  | 118                | <u>FNS</u> – diploic images; weakness/confusion                                         | Tumor of maxillary sinus with orbital infiltration | CA of maxillary sinus with orbital infiltration | /                                                                                         |
| 13          | F   | 43  | 115                | <u>FNS</u> – anisocoria; reduced state of vigilance                                     | Intracranial hemorrhage                            | Intracranial hemorrhage                         | /                                                                                         |
| 14          | F   | 79  | 123                | <u>FNS</u> – hemihypoesthesia, aphasia                                                  | Ischemic media infarction                          | Ischemic media stroke                           | /                                                                                         |
| 15          | F   | 66  | 124                | <u>FNS</u> – aphasia, weakened tendon reflexes of legs; reduced state of vigilance      | Subdural hematoma                                  | Subdural hematoma                               | Diuretics, hypovolemia                                                                    |
| 16          | F   | 65  | 117                | <u>FNS</u> – clearly reduced unilateral arm reflex; neck pain; weakness/confusion       | Cervical spondylodiscitis                          | Cervical spondylodiscitis                       | Hypovolemia                                                                               |
| 17          | F   | 56  | 123                | <u>FNS</u> – unilateral hearing loss; weakness/confusion                                | Meningitis, mastoiditis; tumor in sella turcica    | Meningitis following mastoiditis                | Addison disease                                                                           |

Generally in patients with cerebral processes, hyponatremia might be caused by SIAD (*syndrome of inappropriate antidiuresis*), *adrenocorticotrophic hormone* (ACTH) deficiency and *cerebral salt wasting*. Therefore only additional possible causes for hyponatremia are enlisted in “Etiology of hyponatremia

**Supplementary Figure S1: Prediction model by recursive partitioning analysis.**

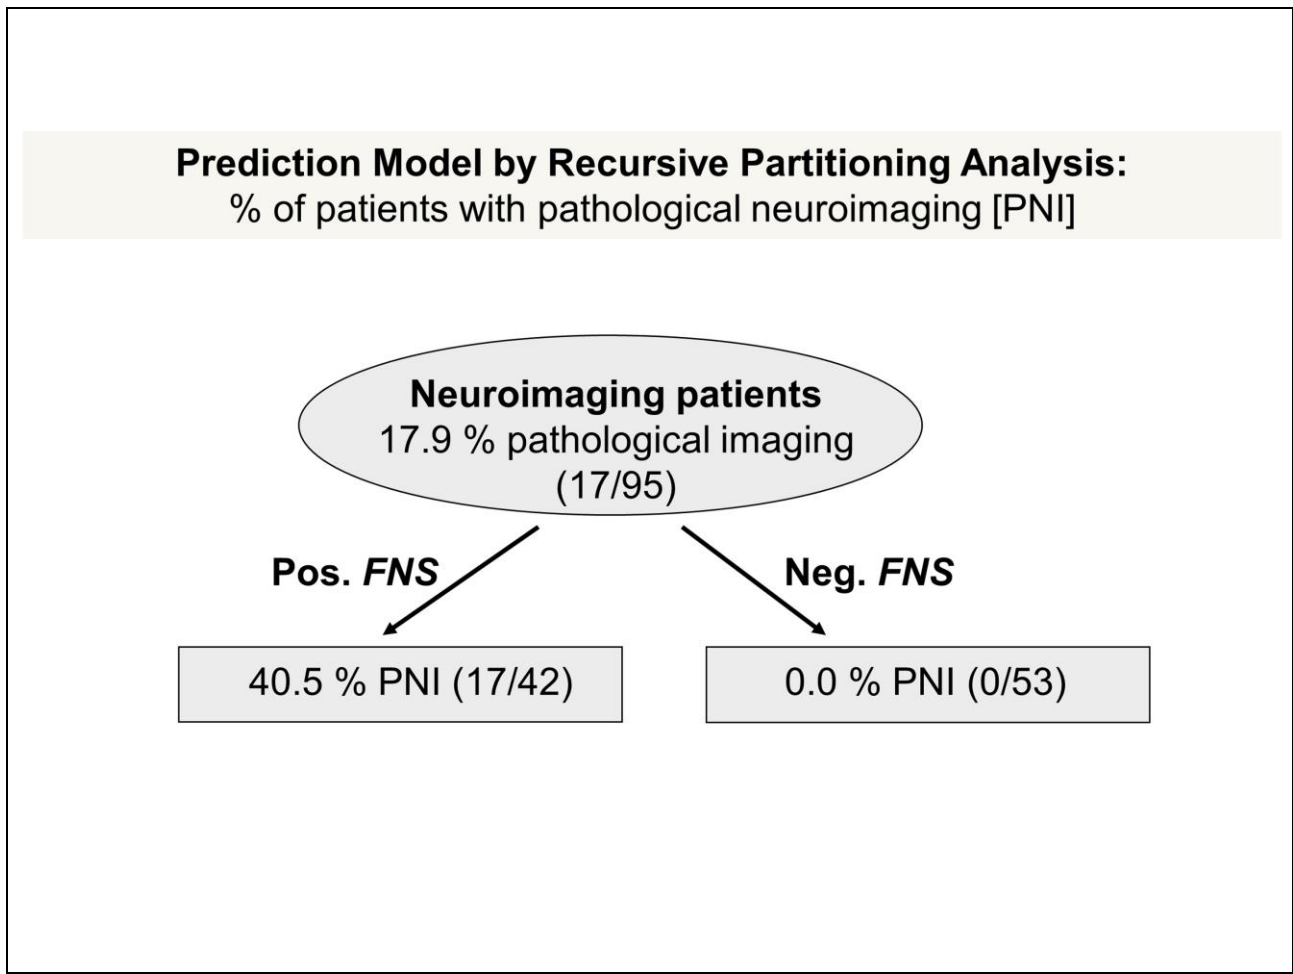

Two split variables. Percent of patients with neuroimaging pathology. *FNS*—*focal neurological signs*.
